# Supplementary material
Source: PubMed Central journal article supplement (PMC514141)
Supplement: plntphys_135_2_1069__1.pdf [file plntphys_135_2_1069__1.pdf]

Table S1. Genes up-regulated in both of the weight treatment and the intermediate stage of Arabidopsis.

| AGI <sup>a</sup> | Gene Description                                                                | Class <sup>b</sup> | Cor <sup>c</sup> | Fold <sup>d</sup> | Fold <sup>e</sup> | AGI       | Gene Description                                             | Class | Cor  | Fold | Fold |
|------------------|---------------------------------------------------------------------------------|--------------------|------------------|-------------------|-------------------|-----------|--------------------------------------------------------------|-------|------|------|------|
| At5g52760        | Putative Protein                                                                | UN                 | 0.97             | 63.9              | 19.5              | At3g46620 | Hypothetical protein                                         | TR    | 0.95 | 4.5  | 2.3  |
| At2g17660        | Unknown protein                                                                 | UN                 | 0.97             | 36.2              | 5.1               | At1g74450 | Unknown protein                                              | UN    | 0.95 | 4.5  | 2.5  |
| At5g57560        | TCH4 protein (gb AAA92363.1)                                                    | CW                 | 0.95             | 34.6              | 15.9              | At4g33920 | Putative protein phosphatase Wip1                            | ST    | 0.96 | 4.5  | 2.1  |
| At3g55980        | Putative protein zinc finger transcription factor (PEI1)                        | TR                 | 0.98             | 26.1              | 14.2              | At1g32640 | Identical to bHLH protein                                    | TR    | 0.99 | 4.5  | 1.9  |
| At3g10930        | Hypothetical protein                                                            | UN                 | 0.95             | 23.9              | 38.0              | At1g77790 | Similar to endo-13-beta-glucanase                            | CW    | 0.99 | 4.4  | 1.9  |
| At5g58120        | resistance protein - like disease resistance protein RPP1-WsA                   | DF                 | 0.96             | 21.4              | 13.7              | At3g19660 | Unknown protein                                              | UN    | 0.99 | 4.4  | 2.3  |
| At2g32140        | Putative disease resistance protein                                             | DF                 | 0.98             | 20.3              | 7.0               | At1g56060 | Hypothetical protein                                         | UN    | 0.99 | 4.4  | 2.2  |
| At3g50930        | BCS1 protein-like protein                                                       | EM                 | 0.97             | 18.7              | 10.1              | At1g63530 | Unknown protein                                              | UN    | 0.96 | 4.3  | 1.2  |
| At1g09950        | Similar to Nicotiana tumor-related protein                                      | TR                 | 0.97             | 16.0              | 26.1              | At5g06320 | harpin-induced protein-like                                  | DF    | 0.99 | 4.3  | 4.2  |
| At3g09870        | Similar to auxin-induced proteins                                               | TR                 | 0.98             | 14.9              | 10.3              | At4g37770 | ACS, 1-aminocyclopropane-1-carboxylate synthase-like protein | SM    | 0.97 | 4.3  | 1.4  |
| At5g52750        | Putative Protein                                                                | UN                 | 0.99             | 14.2              | 7.1               | At2g20145 | Expressed protein; supported by full-length cDNA             | UN    | 0.97 | 4.3  | 1.6  |
| At2g41100        | calmodulin-like protein                                                         | ST                 | 0.98             | 13.8              | 7.0               | At5g39670 | calcium-binding protein - like cbp1                          | ST    | 0.99 | 4.3  | 3.8  |
| At1g63030        | Similar to transcription factor DREB1A                                          | TR                 | 0.99             | 13.7              | 4.3               | At2g20030 | Putative RING zinc finger protein                            | TR    | 0.96 | 4.2  | 1.4  |
| At3g44260        | CCR4-associated factor 1-like protein                                           | TR                 | 0.99             | 12.9              | 7.7               | At3g49530 | NACNAC2-like protein NAC2                                    | TR    | 1.00 | 4.1  | 3.7  |
| At4g27280        | Putative protein centrin                                                        | CC                 | 0.97             | 12.6              | 14.3              | At3g52720 | carbonic anhydrase (CAH1)                                    | PM    | 0.97 | 4.1  | 1.6  |
| At2g27080        | Unknown protein                                                                 | DF                 | 0.95             | 12.1              | 31.8              | At4g23180 | serine/threonine kinase -like protein                        | ST    | 1.00 | 4.0  | 5.4  |
| At2g39650        | Unknown protein                                                                 | UN                 | 0.99             | 11.5              | 7.0               | At1g07135 | Unknown protein                                              | UN    | 0.99 | 4.0  | 2.1  |
| At5g51190        | Similar to ethylene responsive element binding factor                           | TR                 | 0.96             | 10.7              | 6.5               | At5g58660 | Putative protein fruit ripening                              | PM    | 0.97 | 4.0  | 1.4  |
| At1g80820        | Similar to cinnamoyl CoA reductase                                              | SM                 | 0.97             | 10.3              | 3.7               | At5g13700 | polyamine oxidase                                            | SM    | 0.96 | 4.0  | 2.1  |
| At1g72520        | Similar to lipoxigenase                                                         | PM                 | 0.98             | 9.8               | 30.0              | At1g72940 | Similar to disease resistance protein                        | DF    | 1.00 | 4.0  | 2.6  |
| At1g57990        | Unknown protein                                                                 | UN                 | 0.97             | 9.8               | 4.8               | At3g60550 | regulatory protein - like                                    | PM    | 0.96 | 3.9  | 2.9  |
| At4g23810        | AtWRKY53                                                                        | TR                 | 0.95             | 9.8               | 4.0               | At2g01180 | Putative phosphatidic acid phosphatase                       | PM    | 0.99 | 3.9  | 3.2  |
| At2g34600        | Hypothetical protein                                                            | UN                 | 0.99             | 9.6               | 5.8               | At5g41740 | disease resistance protein-like                              | DF    | 0.99 | 3.8  | 6.7  |
| At2g38470        | AtWRKY33, putative WRKY-type DNA binding protein                                | TR                 | 0.99             | 9.4               | 7.9               | At3g46600 | scarecrow-like protein                                       | TR    | 0.97 | 3.7  | 1.7  |
| At2g17040        | NAM (no apical meristem)-like protein                                           | TR                 | 0.97             | 9.2               | 6.1               | At5g14750 | AtMYB66, myb transcription factor werewolf (WER)             | TR    | 0.97 | 3.7  | 1.5  |
| At5g19240        | Putative Protein                                                                | UN                 | 0.97             | 9.1               | 4.5               | At2g07720 | Hypothetical protein                                         | UN    | 0.98 | 3.7  | 1.5  |
| At5g07680        | NAM (no apical meristem)-like protein                                           | TR                 | 0.96             | 8.8               | 1.3               | At3g08860 | Similar to beta-alanine-pyruvate aminotransferase            | PM    | 1.00 | 3.7  | 3.1  |
| At5g61600        | DNA binding protein EREBP-LIKE                                                  | TR                 | 0.98             | 8.5               | 5.7               | At4g33050 | Putative Protein                                             | UN    | 0.96 | 3.7  | 25.1 |
| At1g19380        | Hypothetical protein                                                            | UN                 | 0.98             | 8.3               | 5.2               | At2g41010 | Unknown protein                                              | UN    | 0.99 | 3.7  | 2.4  |
| At4g23220        | serine/threonine kinase - like protein serine/threonine kinase                  | ST                 | 0.99             | 8.2               | 2.7               | At5g62570 | Similarity to calmodulin-binding protein                     | ST    | 0.99 | 3.7  | 2.1  |
| At3g26210        | cytochrome P450putative                                                         | SM                 | 0.99             | 8.2               | 4.8               | At5g01540 | receptor like protein kinase                                 | ST    | 0.99 | 3.6  | 2.0  |
| At3g45960        | Putative protein cim1 induced allergen                                          | CW                 | 0.97             | 8.0               | 7.1               | At2g30070 | high affinity K+ transporter (AtKUP1/AtKT1p)                 | TP    | 0.96 | 3.6  | 1.4  |
| At4g14365        | Expressed protein; supported by full-length cDNA                                | UN                 | 0.96             | 7.8               | 5.2               | At1g53540 | 17.6 kDa heat shock protein (AA 1-156)                       | DF    | 0.97 | 3.6  | 1.4  |
| At2g34930        | Putative disease resistance protein                                             | DF                 | 0.99             | 7.6               | 3.1               | At5g18470 | Putative protein S-receptor kinase PK3 precursor             | ST    | 0.99 | 3.6  | 2.1  |
| At2g23810        | Hypothetical protein                                                            | CF                 | 0.98             | 7.3               | 6.0               | At5g57785 | Expressed protein; supported by full-length cDNA             | UN    | 0.97 | 3.6  | 1.4  |
| At1g72920        | Similar to virus resistance protein                                             | DF                 | 0.99             | 7.2               | 3.4               | At5g39580 | peroxidase ATP24a                                            | DF    | 0.97 | 3.5  | 1.4  |
| At1g17380        | Unknown protein                                                                 | UN                 | 0.96             | 7.2               | 2.4               | At1g16370 | Putative transport protein sugar transporter family          | TP    | 0.96 | 3.5  | 1.2  |
| At5g47230        | ethylene responsive element binding factor 5 (ATERF5)                           | TR                 | 0.99             | 7.2               | 2.9               | At5g35735 | Expressed protein; supported by full-length cDNA             | UN    | 0.99 | 3.5  | 3.4  |
| At3g50060        | AtMYB77R2R3-MYB transcription factor                                            | TR                 | 0.99             | 7.1               | 3.9               | At2g01960 | Unknown protein                                              | PD    | 1.00 | 3.5  | 2.4  |
| At4g37610        | Putative protein SPOP                                                           | CT                 | 0.97             | 7.0               | 2.2               | At5g47960 | RAS superfamily GTP-binding protein-like                     | ST    | 0.99 | 3.5  | 4.1  |
| At1g72240        | Hypothetical protein                                                            | UN                 | 0.98             | 7.0               | 4.7               | At1g50530 | Hypothetical protein                                         | UN    | 0.97 | 3.4  | 1.4  |
| At1g55050        | Hypothetical protein                                                            | UN                 | 0.97             | 6.6               | 1.4               | At4g25390 | receptor kinase-like protein                                 | ST    | 0.98 | 3.4  | 2.0  |
| At5g37770        | CALMODULIN-RELATED PROTEIN 2TOUCH-INDUCED (TCH2)                                | ST                 | 0.97             | 6.5               | 4.8               | At3g52800 | zinc finger - like protein                                   | TR    | 1.00 | 3.4  | 2.4  |
| At3g57530        | calcium-dependent protein kinase                                                | ST                 | 0.99             | 6.2               | 5.1               | At1g30370 | Putative lipase                                              | PM    | 0.98 | 3.4  | 1.6  |
| At1g18570        | AtMYB51myb transcription factor                                                 | TR                 | 0.98             | 6.1               | 11.6              | At1g10560 | Similar to zinc-binding protein                              | ST    | 0.96 | 3.4  | 1.3  |
| At5g37110        | Putative helicase PIF1 protein                                                  | UN                 | 0.98             | 6.1               | 7.2               | At1g30040 | Unknown protein                                              | SM    | 0.99 | 3.3  | 2.9  |
| At4g24380        | Putative protein dihydrofolate reductase                                        | PM                 | 0.99             | 5.9               | 5.6               | At5g25610 | Similar to chloroplast-localized small heat shock protein    | DF    | 0.98 | 3.3  | 7.8  |
| At5g28940        | Similar to replication proteins                                                 | CC                 | 0.98             | 5.8               | 1.7               | At5g66070 | Putative Protein                                             | TR    | 0.97 | 3.3  | 1.7  |
| At4g02380        | Similar to several small proteins induced by heat, auxin, ethylene and wounding | DF                 | 1.00             | 5.7               | 5.4               | At4g02200 | Similar to drought-induced-19                                | DF    | 1.00 | 3.3  | 4.0  |
| At2g40140        | Putative CCH-type zinc finger protein also an ankyrin-repeat protein            | TR                 | 0.99             | 5.7               | 5.5               | At1g70880 | Similar to ripening-induced protein                          | DF    | 0.98 | 3.3  | 1.7  |
| At1g14480        | Similarity to alpha-latroinsectotoxin precursor                                 | UN                 | 0.97             | 5.6               | 2.9               | At4g33340 | Hypothetical protein                                         | UN    | 0.95 | 3.3  | 1.6  |
| At5g47220        | ethylene responsive element binding factor 2 (ATERF2)                           | TR                 | 1.00             | 5.6               | 2.6               | At1g22190 | AP2/EREBPAP2 domain containing protein RAP2                  | TR    | 1.00 | 3.3  | 2.5  |
| At3g48520        | cytochrome P450-like protein                                                    | SM                 | 0.97             | 5.5               | 1.5               | At5g95550 | Putative protein COP1-interacting protein CIP8               | TR    | 0.99 | 3.3  | 2.3  |
| At1g25400        | Unknown protein                                                                 | UN                 | 0.98             | 5.4               | 5.6               | At3g08870 | Similar to serine/threonine-specific kinase                  | ST    | 1.00 | 3.3  | 3.2  |
| At3g52400        | syntxin-like protein synt4                                                      | CT                 | 0.98             | 5.3               | 5.3               | At3g45640 | mitogen-activated protein kinase 3                           | ST    | 1.00 | 3.3  | 6.4  |
| At4g17500        | ethylene responsive element binding factor 1                                    | TR                 | 1.00             | 5.3               | 5.5               | At1g67920 | Unknown protein                                              | UN    | 0.99 | 3.2  | 7.6  |
| At3g08720        | Putative ribosomal-protein S6 kinase (ATPK19)                                   | PS                 | 0.96             | 5.3               | 2.0               | At4g38870 | Putative protein                                             | TR    | 1.00 | 3.2  | 2.9  |
| At1g34670        | AtMYB93myb-related protein                                                      | TR                 | 0.95             | 5.3               | 1.5               | At5g25930 | receptor-like protein kinase                                 | ST    | 0.99 | 3.2  | 2.5  |
| At1g02660        | Hypothetical protein                                                            | UN                 | 0.95             | 5.2               | 2.4               | At5g11650 | lysophospholipase - like protein                             | PM    | 0.98 | 3.2  | 3.1  |
| At2g31880        | Putative receptor-like protein kinase                                           | ST                 | 0.97             | 5.1               | 4.3               | At4g04540 | Putative receptor-like protein kinase                        | ST    | 1.00 | 3.2  | 4.7  |
| At2g24600        | Hypothetical protein                                                            | TP                 | 0.99             | 5.0               | 4.0               | At4g18290 | potassium channel protein KAT2                               | TP    | 0.96 | 3.2  | 1.4  |
| At1g66160        | Unknown protein                                                                 | ST                 | 0.96             | 5.0               | 5.3               | At4g20140 | leucine rich repeat-like protein Cf-2.2                      | PF    | 0.95 | 3.2  | 1.1  |
| At2g21780        | Hypothetical protein                                                            | UN                 | 1.00             | 4.8               | 3.7               | At4g21370 | receptor kinase - like protein                               | ST    | 0.99 | 3.2  | 2.2  |
| At1g32920        | Unknown protein                                                                 | UN                 | 0.96             | 4.8               | 4.2               | At4g30470 | cinnamoyl-CoA reductase - like protein                       | SM    | 0.98 | 3.2  | 2.4  |
| At5g66210        | calcium-dependent protein kinase                                                | ST                 | 1.00             | 4.8               | 4.1               | At5g46780 | Putative Protein                                             | UN    | 0.96 | 3.2  | 1.9  |
| At4g02410        | Unknown protein                                                                 | ST                 | 1.00             | 4.8               | 6.4               | At1g51820 | Similar to light repressible receptor protein kinase         | ST    | 0.98 | 3.2  | 2.8  |
| At2g44840        | Putative ethylene response element binding protein (EREBP)                      | TR                 | 0.99             | 4.8               | 2.6               | At3g56880 | Putative Protein                                             | UN    | 0.99 | 3.2  | 2.3  |
| At1g44830        | AP2/EREBPtranscription factorputative contains AP2 domain                       | TR                 | 0.97             | 4.8               | 2.9               | At4g39640 | Putative gamma-glutamyltransferase                           | DF    | 0.98 | 3.2  | 1.7  |
| At2g32540        | Putative cellulose synthase                                                     | CW                 | 0.96             | 4.7               | 1.8               | At1g70740 | Putative protein kinase                                      | ST    | 0.97 | 3.2  | 1.3  |
| At4g08950        | Putative phi-1-like phosphate-induced protein                                   | UN                 | 0.96             | 4.7               | 9.1               | At4g25810 | xyloglucan endo-14-beta-D-glucanase (XTR-6)                  | CW    | 0.96 | 3.1  | 1.4  |
| At1g35210        | Hypothetical protein                                                            | UN                 | 0.99             | 4.7               | 2.5               | At3g18560 | Unknown protein                                              | UN    | 0.95 | 3.1  | 1.6  |
| At1g64370        | Unknown protein                                                                 | UN                 | 1.00             | 4.7               | 3.7               | At4g20830 | reticuline oxidase -like protein                             | SM    | 0.99 | 3.1  | 2.8  |
| At1g66090        | Similar to disease resistance protein RPP1-WsA                                  | DF                 | 0.98             | 4.6               | 3.3               | At4g16620 | membrane protein homolog                                     | PD    | 0.99 | 3.1  | 1.8  |
| At3g16720        | Similar to RING-H2 zinc finger protein ATL6                                     | TR                 | 0.96             | 4.5               | 2.3               | At2g05940 | Putative protein kinase                                      | ST    | 0.98 | 3.1  | 2.1  |
| At3g24520        | Similar to heat shock transcription factor HSF1                                 | TR                 | 0.96             | 4.5               | 1.3               | At5g49520 | AtWRKY48, WRKY-type DNA-binding protein                      | TR    | 0.96 | 3.1  | 1.3  |
| At1g63750        | Similar to disease resistance protein (RPP1-WsC)                                | DF                 | 0.97             | 4.5               | 4.7               | At3g25600 | Similar to calmodulin                                        | ST    | 0.96 | 3.1  | 2.3  |

|           |                                                                             |    |      |     |      |           |                                                                                |    |      |     |     |
|-----------|-----------------------------------------------------------------------------|----|------|-----|------|-----------|--------------------------------------------------------------------------------|----|------|-----|-----|
| At2g32150 | Putative hydrolase                                                          | PD | 1.00 | 3.1 | 3.0  | At3g27450 | Similar to 40S ribosomal subunit protein S21                                   | PS | 0.96 | 2.5 | 1.3 |
| At3g25780 | Unknown protein                                                             | UN | 1.00 | 3.1 | 3.1  | At1g78720 | Similar to protein transport protein sec61 alpha subunit                       | PF | 0.96 | 2.5 | 1.3 |
| At5g37540 | Putative protein nucleoid DNA-binding protein cnd41                         | TR | 0.97 | 3.1 | 3.3  | At5g13190 | Putative Protein                                                               | UN | 1.00 | 2.5 | 3.1 |
| At2g45220 | Putative pectinesterase                                                     | CW | 0.96 | 3.1 | 7.1  | At4g24160 | Putative protein CGI-58 protein                                                | PM | 0.97 | 2.4 | 1.9 |
| At5g26030 | ferrochelatase-I                                                            | PM | 0.97 | 3.0 | 2.1  | At5g57680 | Putative Protein                                                               | ST | 0.99 | 2.4 | 3.3 |
| At3g59080 | Putative protein CND41 chloroplast nucleoid DNA binding protein             | TR | 1.00 | 3.0 | 5.3  | At5g38350 | disease resistance protein-like                                                | DF | 0.96 | 2.4 | 1.2 |
| At3g19010 | Similarity to flavonol synthase (FLS)                                       | SM | 1.00 | 3.0 | 2.8  | At5g14130 | peroxidase ATP20a (emb CAA67338.1)                                             | DF | 0.99 | 2.4 | 2.6 |
| At5g35660 | Unknown protein                                                             | UN | 0.97 | 3.0 | 1.4  | At3g04210 | Similar to disease resistance protein RPP1-WsC                                 | DF | 0.96 | 2.4 | 4.5 |
| At3g03910 | Similar to glutamate dehydrogenase 1                                        | PM | 0.99 | 3.0 | 2.5  | At4g09740 | cellulase-like protein cellulase (EC 3.2.1.4)                                  | CW | 0.95 | 2.4 | 1.4 |
| At1g29690 | Unknown protein                                                             | UN | 0.96 | 3.0 | 2.9  | At5g17330 | glutamate decarboxylase 1 (GAD 1)                                              | PM | 0.96 | 2.4 | 1.2 |
| At3g56710 | SigA binding protein                                                        | TR | 0.97 | 3.0 | 2.5  | At4g04110 | Putative RPP1-like disease resistance protein                                  | DF | 0.97 | 2.4 | 1.9 |
| At4g29640 | cytidine deaminase 5 (CDA5)                                                 | PM | 0.98 | 2.9 | 1.7  | At1g52200 | Unknown protein                                                                | UN | 0.96 | 2.4 | 1.2 |
| At1g56150 | Unknown protein                                                             | UN | 0.99 | 2.9 | 2.1  | At1g72930 | Similar to flax rust resistance protein                                        | DF | 0.96 | 2.4 | 3.6 |
| At1g72900 | Similar to virus resistance protein                                         | DF | 0.98 | 2.9 | 2.2  | At2g43290 | Putative calcium binding protein                                               | ST | 0.99 | 2.4 | 2.9 |
| At5g50260 | Similar to cysteine endopeptidase precursor CysEP                           | PF | 0.96 | 2.9 | 5.1  | At1g55390 | Hypothetical protein                                                           | TR | 0.95 | 2.4 | 1.2 |
| At3g56400 | AtWRKY70, DNA-binding protein                                               | TR | 1.00 | 2.9 | 3.7  | At5g20110 | dynein light chain - like protein                                              | CT | 0.98 | 2.4 | 1.6 |
| At1g65400 | Similarity to lectin polypeptide                                            | PF | 0.97 | 2.9 | 1.9  | At1g20823 | predicted protein                                                              | UN | 0.99 | 2.4 | 2.7 |
| At1g02810 | Similar to pectin esterase                                                  | CW | 0.98 | 2.9 | 2.0  | At2g43000 | NAM (no apical meristem)-like protein                                          | TR | 0.96 | 2.4 | 1.5 |
| At5g57070 | Putative Protein                                                            | UN | 0.95 | 2.9 | 2.7  | At2g25790 | Putative receptor-like protein kinase                                          | ST | 1.00 | 2.4 | 3.7 |
| At1g27100 | Unknown protein                                                             | UN | 0.99 | 2.9 | 2.2  | At3g54200 | Putative protein hin1 protein                                                  | UN | 0.99 | 2.3 | 2.5 |
| At5g16200 | Putative Protein                                                            | UN | 0.98 | 2.9 | 1.6  | At5g58570 | Expressed protein; supported by full-length cDNA                               | UN | 0.98 | 2.3 | 2.3 |
| At1g51700 | Dof zinc finger protein                                                     | TR | 0.99 | 2.8 | 2.3  | At1g55940 | Similar to cytochrome P450                                                     | SM | 0.96 | 2.3 | 1.3 |
| At2g28400 | Hypothetical protein                                                        | UN | 0.98 | 2.8 | 1.5  | At1g59910 | Hypothetical protein                                                           | TR | 0.97 | 2.3 | 1.7 |
| At1g70950 | Hypothetical protein                                                        | UN | 0.95 | 2.8 | 1.1  | At1g72300 | Similar to leucine-rich receptor-like protein kinase                           | ST | 0.95 | 2.3 | 1.6 |
| At4g20110 | vacuolar sorting receptor-like protein BP-80                                | PF | 0.95 | 2.8 | 3.7  | At5g47050 | Similarity to S-ribonuclease binding protein                                   | PM | 0.97 | 2.3 | 1.7 |
| At1g50740 | Unknown protein                                                             | UN | 1.00 | 2.8 | 3.0  | At1g21000 | Unknown protein                                                                | UN | 0.98 | 2.3 | 3.7 |
| At4g21780 | Hypothetical protein                                                        | UN | 0.98 | 2.8 | 1.8  | At1g56510 | disease resistance protein                                                     | DF | 0.99 | 2.3 | 2.7 |
| At1g14870 | Unknown protein                                                             | UN | 0.98 | 2.8 | 1.7  | At3g43270 | pectinesterase -like protein                                                   | CW | 0.96 | 2.3 | 1.4 |
| At5g11570 | Putative oligopeptide transporter protein LeOPT1                            | PF | 1.00 | 2.8 | 5.7  | At4g08410 | extensin-like protein hydroxyproline-rich glycoprotein precursor               | CW | 0.95 | 2.3 | 1.1 |
| At5g15830 | AtbZIP3, bZIP DNA-binding protein-like                                      | TR | 0.97 | 2.8 | 3.6  | At1g57740 | Expressed protein; supported by full-length cDNA                               | ST | 0.99 | 2.3 | 1.9 |
| At2g28780 | Hypothetical protein                                                        | UN | 1.00 | 2.8 | 3.3  | At2g24100 | Unknown protein                                                                | UN | 0.96 | 2.3 | 1.3 |
| At1g09070 | Similar to Glycine SRC2                                                     | SM | 0.99 | 2.8 | 2.2  | At1g69490 | Unknown protein similar to N-term half of NAC domain protein NAM               | TR | 0.97 | 2.3 | 1.4 |
| At4g15190 | Hypothetical protein                                                        | UN | 1.00 | 2.8 | 2.7  | At1g57740 | Hypothetical protein                                                           | UN | 0.95 | 2.3 | 1.3 |
| At1g35370 | Similar to gypsy/Ty3 element polyprotein                                    | TE | 0.98 | 2.8 | 1.6  | At2g04795 | Expressed protein; supported by full-length cDNA                               | UN | 0.97 | 2.3 | 3.3 |
| At4g04830 | Similar to transcriptional regulator                                        | TR | 0.97 | 2.8 | 2.1  | At1g73830 | Putative helix-loop-helix DNA-binding protein                                  | TR | 0.97 | 2.3 | 1.6 |
| At1g40150 | Hypothetical protein                                                        | UN | 0.97 | 2.8 | 1.4  | At5g12030 | heat shock protein 17.6A                                                       | DF | 0.97 | 2.3 | 1.5 |
| At3g57450 | Putative Protein                                                            | UN | 0.97 | 2.8 | 2.6  | At5g45000 | Similarity to disease resistance protein                                       | DF | 0.96 | 2.3 | 1.5 |
| At1g21910 | Similar to TINY                                                             | TR | 0.99 | 2.8 | 1.8  | At5g38900 | IrnE protein - like IrnE protein                                               | SM | 0.97 | 2.3 | 1.6 |
| At2g37970 | Unknown protein                                                             | UN | 0.97 | 2.8 | 2.0  | At5g50800 | M1N3-like protein                                                              | CF | 0.97 | 2.3 | 2.4 |
| At1g67470 | Putative protein kinase                                                     | ST | 0.97 | 2.8 | 1.7  | At1g17250 | Putative receptor protein kinase                                               | DF | 0.99 | 2.3 | 2.2 |
| At1g07520 | Similar to transcription factor scarecrow-like 14                           | TR | 0.98 | 2.7 | 1.8  | At5g67300 | AtMYB44                                                                        | TR | 0.98 | 2.3 | 2.5 |
| At1g71697 | Similar to CHOLINE/ETHANOLAMINE KINASE                                      | SM | 1.00 | 2.7 | 3.4  | At1g59740 | Similar to oligopeptide transporter                                            | TP | 0.99 | 2.3 | 1.9 |
| At1g58420 | Hypothetical protein                                                        | UN | 0.99 | 2.7 | 2.4  | At5g25440 | Putative protein kinase serine/threonine/tyrosine-specific protein kinase APK1 | ST | 0.98 | 2.3 | 2.9 |
| At1g68510 | Hypothetical protein                                                        | UN | 0.97 | 2.7 | 1.7  | At2g47060 | Putative protein kinase                                                        | ST | 0.98 | 2.3 | 2.1 |
| At3g19580 | Similar to Cys2/His2-type zinc finger protein 2                             | TR | 0.97 | 2.7 | 2.1  | At3g19200 | Hypothetical protein                                                           | TE | 0.99 | 2.3 | 2.3 |
| At3g19030 | Similarity to phosphoserine aminotransferase                                | UN | 0.97 | 2.7 | 10.1 | At4g01430 | Unknown protein                                                                | PD | 0.98 | 2.3 | 2.4 |
| At4g23150 | serine/threonine kinase-like protein, KI domain interacting kinase 1 (KIK1) | ST | 0.97 | 2.7 | 1.3  | At5g38240 | receptor serine/threonine protein kinase -like                                 | ST | 0.97 | 2.3 | 1.6 |
| At1g11050 | Ser/Thr protein kinase isolog                                               | ST | 0.99 | 2.7 | 2.7  | At1g12100 | Similar to hybrid proline-rich protein                                         | UN | 0.98 | 2.3 | 1.6 |
| At4g23350 | Putative Protein                                                            | UN | 0.98 | 2.7 | 2.2  | At1g09380 | Similar to nodulin proteinN21                                                  | PD | 0.96 | 2.3 | 1.3 |
| At5g20230 | Caffeic acid O-methyltransferase                                            | SM | 0.99 | 2.7 | 2.6  | At5g04760 | I-box binding factor - like protein                                            | TR | 0.99 | 2.3 | 2.5 |
| At5g38710 | proline oxidase mitochondrial precursor -like protein                       | PM | 0.99 | 2.7 | 1.9  | At1g72120 | Similar to oligopeptide transporterLeOPT1                                      | TP | 0.99 | 2.2 | 2.1 |
| At4g09030 | arabinogalactan-protein homolog                                             | CW | 1.00 | 2.7 | 2.5  | At3g50130 | Putative Protein                                                               | UN | 0.99 | 2.2 | 3.2 |
| At4g08530 | Putative lipid transfer protein                                             | TP | 0.96 | 2.7 | 1.5  | At2g40270 | Putative protein kinase                                                        | ST | 0.98 | 2.2 | 1.9 |
| At1g76600 | Unknown protein                                                             | UN | 0.96 | 2.7 | 1.5  | At1g26730 | Putative aldehyde oxidase                                                      | CF | 0.97 | 2.2 | 1.4 |
| At2g43570 | endochitinase isolog                                                        | DF | 0.98 | 2.7 | 1.9  | At2g43450 | Hypothetical protein                                                           | UN | 0.96 | 2.2 | 1.3 |
| At3g22840 | Identical to early light-induced protein                                    | EM | 0.96 | 2.7 | 3.9  | At2g07696 | Hypothetical protein                                                           | UN | 0.98 | 2.2 | 2.2 |
| At4g31800 | AtWRKY18                                                                    | TR | 0.98 | 2.7 | 4.4  | At2g42760 | Unknown protein                                                                | UN | 0.96 | 2.2 | 1.3 |
| At1g76690 | 12-oxophytodienoate reductase (OPR2)                                        | EM | 0.99 | 2.6 | 2.9  | At1g05575 | Expressed protein; supported by full-length cDNA                               | UN | 0.97 | 2.2 | 1.6 |
| At1g17990 | Similar to 12-oxophytodienoate reductase OPR1                               | EM | 0.98 | 2.6 | 1.6  | At2g34410 | Hypothetical protein                                                           | UN | 0.96 | 2.2 | 1.7 |
| At2g33580 | Putative protein kinase                                                     | ST | 0.99 | 2.6 | 2.6  | At3g14620 | Putative cytochrome P450                                                       | SM | 0.96 | 2.2 | 2.6 |
| At4g17230 | scarecrow-like 13 (SCL13)                                                   | TR | 0.97 | 2.6 | 2.1  | At4g04290 | Putative reverse transcriptase                                                 | TE | 0.97 | 2.2 | 3.2 |
| At5g44390 | berberine bridge enzyme-like protein                                        | SM | 0.97 | 2.6 | 1.9  | At2g31550 | Putative GDSL-motif lipase/hydrolase                                           | PM | 0.98 | 2.2 | 1.9 |
| At2g43050 | Putative pectinesterase                                                     | CW | 0.98 | 2.6 | 2.6  | At5g15950 | S-adenosylmethionine decarboxylase (adoMetDC2)                                 | SM | 0.98 | 2.2 | 2.5 |
| At5g42050 | Putative Protein                                                            | UN | 0.98 | 2.6 | 2.5  | At5g58430 | leucine zipper-containing protein                                              | TR | 0.98 | 2.2 | 1.7 |
| At2g23320 | AtWRKY15                                                                    | TR | 0.98 | 2.6 | 1.8  | At5g12940 | Putative protein DRT100 protein                                                | ST | 0.98 | 2.2 | 2.3 |
| At4g15800 | Expressed protein; supported by full-length cDNA                            | TP | 0.99 | 2.6 | 1.9  | At3g51860 | Ca2+/H+-exchanging protein-like                                                | TP | 0.96 | 2.2 | 2.0 |
| At4g24110 | Putative Protein                                                            | UN | 0.97 | 2.6 | 2.6  | At5g04720 | disease resistance - like protein                                              | DF | 0.99 | 2.2 | 2.9 |
| At1g43910 | Unknown protein                                                             | EM | 0.97 | 2.5 | 2.2  | At1g71450 | Putative TINY                                                                  | TR | 0.95 | 2.2 | 1.4 |
| At3g01430 | Hypothetical protein                                                        | UN | 0.99 | 2.5 | 4.4  | At5g37690 | Putative Protein                                                               | SM | 0.97 | 2.2 | 1.6 |
| At2g17500 | Unknown protein                                                             | CW | 0.97 | 2.5 | 1.6  | At2g07030 | Similar to MURA transposase of maize                                           | TE | 0.96 | 2.2 | 1.5 |
| At5g10380 | Putative protein                                                            | TR | 0.99 | 2.5 | 2.5  | At2g03210 | FUT2putative fucosyltransferaseunknown protein                                 | CW | 0.99 | 2.2 | 2.4 |
| At5g44580 | Unknown protein                                                             | UN | 0.99 | 2.5 | 2.0  | At4g17340 | membrane channel like protein                                                  | TP | 0.98 | 2.2 | 2.1 |
| At1g27770 | envelope Ca2+-ATPase                                                        | TP | 0.99 | 2.5 | 2.5  | At5g50915 | Expressed protein; supported by full-length cDNA                               | UN | 0.96 | 2.2 | 3.7 |
| At3g62720 | alpha galactosyltransferase-like protein                                    | CW | 0.99 | 2.5 | 2.8  | At4g21390 | serine/threonine kinase - like protein                                         | ST | 0.98 | 2.2 | 4.0 |
| At4g12720 | growth factor like protein                                                  | UN | 0.99 | 2.5 | 3.9  | At1g27200 | Unknown protein                                                                | UN | 0.98 | 2.1 | 1.8 |
| At1g07870 | Similar to protein kinase                                                   | ST | 0.98 | 2.5 | 1.7  | At1g74670 | GAST1-like protein                                                             | SM | 0.97 | 2.1 | 1.8 |
| At2g26530 | Similar to yeast allergen receptor                                          | PS | 0.99 | 2.5 | 2.1  | At1g21390 | Hypothetical protein                                                           | UN | 0.98 | 2.1 | 2.2 |
| At4g38400 | Putative pollen allergen pollen allergen                                    | CW | 0.96 | 2.5 | 3.0  | At5g25190 | ethylene-responsive element - like protein                                     | TR | 0.96 | 2.1 | 1.6 |
| At5g26220 | Putative protein cation transport protein                                   | TP | 0.98 | 2.5 | 4.0  | At5g37910 | Putative protein SlAH1                                                         | TR | 0.95 | 2.1 | 1.3 |
| At4g08880 | Hypothetical protein                                                        | UN | 0.99 | 2.5 | 5.1  | At5g36000 | Putative Protein                                                               | UN | 0.98 | 2.1 | 1.9 |

|           |                                                                 |    |      |     |     |           |                                                              |    |      |     |     |
|-----------|-----------------------------------------------------------------|----|------|-----|-----|-----------|--------------------------------------------------------------|----|------|-----|-----|
| At3g46900 | copper transport protein - like protein                         | TP | 0.99 | 2.1 | 4.4 | At3g02800 | Unknown protein                                              | UN | 0.97 | 1.9 | 1.7 |
| At1g20700 | Hypothetical protein                                            | TR | 0.96 | 2.1 | 1.4 | At5g53590 | Unknown protein                                              | UN | 0.96 | 1.9 | 1.4 |
| At2g14920 | Putative steroid sulfotransferase                               | SM | 0.99 | 2.1 | 3.6 | At4g30440 | UDP-glucuronate 4-epimerase GAE1                             | CW | 0.98 | 1.9 | 2.2 |
| At3g54270 | <b>Putative Protein</b>                                         | UN | 0.96 | 2.1 | 1.3 | At5g22690 | disease resistance protein-like                              | DF | 0.97 | 1.9 | 1.8 |
| At3g42360 | <b>Putative Protein</b>                                         | TE | 0.98 | 2.1 | 1.8 | At3g59370 | <b>Putative Protein</b>                                      | UN | 0.96 | 1.9 | 1.4 |
| At3g29210 | Hypothetical protein                                            | UN | 0.96 | 2.1 | 1.4 | At1g70110 | Receptor-like kinase                                         | ST | 0.99 | 1.9 | 2.7 |
| At2g17290 | Putative calmodulin-domain protein kinase CPK6                  | ST | 0.97 | 2.1 | 1.6 | At1g67880 | Similar to N-acetylglucosaminyltransferase III               | PM | 0.96 | 1.9 | 1.9 |
| At1g11540 | Hypothetical protein                                            | UN | 0.97 | 2.1 | 1.5 | At1g20160 | Subtilisin-like serine protease                              | PF | 0.98 | 1.9 | 2.2 |
| At5g66620 | <b>Putative Protein</b>                                         | DF | 0.98 | 2.1 | 2.6 | At3g06890 | Hypothetical protein                                         | UN | 0.96 | 1.9 | 1.4 |
| At1g69840 | Unknown protein                                                 | DF | 0.96 | 2.1 | 2.2 | At5g40460 | <b>Putative Protein</b>                                      | UN | 0.96 | 1.9 | 1.3 |
| At5g43180 | <b>Putative Protein</b>                                         | UN | 0.99 | 2.1 | 2.4 | At1g05260 | Putative peroxidase ATPEROX7A                                | DF | 0.99 | 1.8 | 2.8 |
| At5g24655 | Expressed protein; supported by full-length cDNA                | UN | 0.95 | 2.1 | 1.3 | At1g11070 | Hypothetical protein                                         | UN | 0.96 | 1.8 | 2.0 |
| At5g43040 | CHP-rich zinc finger protein-like                               | TR | 0.96 | 2.1 | 1.3 | At4g34610 | Homeodomain - like protein, BEL1                             | TR | 0.97 | 1.8 | 1.6 |
| At2g28650 | Hypothetical protein                                            | TR | 0.97 | 2.1 | 1.6 | At2g31730 | Unknown protein                                              | UN | 0.97 | 1.8 | 1.8 |
| At4g17690 | peroxidase like protein                                         | SM | 0.98 | 2.1 | 1.8 | At4g14760 | centromere protein homolog                                   | CC | 0.96 | 1.8 | 1.4 |
| At2g17220 | Putative protein kinase                                         | ST | 0.98 | 2.1 | 1.9 | At1g68690 | Similar to protein kinase 1                                  | ST | 0.96 | 1.8 | 3.6 |
| At3g14850 | Hypothetical protein                                            | UN | 0.97 | 2.1 | 2.1 | At4g05020 | <b>Unknown protein</b>                                       | EM | 0.97 | 1.8 | 1.6 |
| At1g76360 | Putative protein kinase                                         | ST | 0.99 | 2.0 | 7.0 | At2g27830 | Unknown protein                                              | UN | 0.98 | 1.8 | 2.1 |
| At4g37260 | AtMYB73myb-related protein                                      | TR | 0.99 | 2.0 | 3.0 | At3g44720 | Putative chloroplast prephenate dehydratase                  | PM | 0.97 | 1.8 | 2.3 |
| At5g62730 | nitrate transporter NTL1 - like protein                         | TP | 0.96 | 2.0 | 4.5 | At4g31330 | predicted protein                                            | UN | 0.96 | 1.8 | 1.7 |
| At1g19770 | Unknown protein                                                 | UN | 0.99 | 2.0 | 2.5 | At1g70990 | Unknown protein                                              | UN | 0.97 | 1.8 | 1.9 |
| At1g71140 | Hypothetical protein                                            | TP | 0.95 | 2.0 | 1.4 | At1g77900 | Unknown protein                                              | UN | 0.97 | 1.8 | 1.9 |
| At3g17800 | Unknown protein                                                 | UN | 0.96 | 2.0 | 1.3 | At4g33180 | <b>Putative Protein</b>                                      | PM | 0.96 | 1.8 | 1.4 |
| At5g35490 | <b>Putative Protein</b>                                         | UN | 0.98 | 2.0 | 1.7 | At4g02075 | Expressed protein; supported by full-length cDNA             | UN | 0.96 | 1.8 | 3.8 |
| At2g44500 | Similar to axi 1 protein                                        | CF | 0.99 | 2.0 | 2.3 | At1g31130 | Unknown protein                                              | UN | 0.96 | 1.8 | 1.5 |
| At4g36500 | <b>Putative Protein</b>                                         | UN | 0.97 | 2.0 | 2.2 | At2g32210 | Unknown protein                                              | UN | 0.96 | 1.8 | 3.0 |
| At3g50760 | Putative UDP-glucose:(glucosyl) LPS alpha13-glucosyltransferase | CW | 0.98 | 2.0 | 1.9 | At3g57880 | anthranilate phosphoribosyltransferase-like protein          | PM | 0.97 | 1.8 | 1.6 |
| At4g18880 | heat shock transcription factor - like protein                  | TR | 0.98 | 2.0 | 2.1 | At4g35030 | leucine rich repeat receptor-like kinase                     | ST | 0.96 | 1.8 | 1.4 |
| At1g09575 | Expressed protein; supported by full-length cDNA                | UN | 0.95 | 2.0 | 2.2 | At3g08810 | Unknown protein                                              | UN | 0.96 | 1.8 | 1.5 |
| At4g37530 | peroxidase - like protein                                       | DF | 0.95 | 2.0 | 1.3 | At3g28180 | Unknown protein                                              | PM | 0.97 | 1.8 | 1.6 |
| At3g25610 | Similar to ATPase II                                            | TP | 0.95 | 2.0 | 5.5 | At1g75020 | Putative acyl-CoA:1-acylglycerol-3-phosphate acyltransferase | PM | 0.97 | 1.8 | 2.7 |
| At5g59450 | scarecrow-like 11 - like                                        | TR | 0.96 | 2.0 | 1.3 | At4g25620 | <b>Putative Protein</b>                                      | UN | 0.96 | 1.8 | 1.5 |
| At1g09970 | Similar to A. thaliana receptor-like protein kinase             | ST | 0.98 | 2.0 | 4.0 | At5g53130 | cyclic nucleotide-regulated ion channel                      | TP | 0.97 | 1.8 | 1.9 |
| At2g36040 | Hypothetical protein                                            | UN | 0.99 | 2.0 | 6.1 | At2g46600 | Putative caltractin                                          | ST | 0.99 | 1.8 | 3.1 |
| At4g23280 | serine /threonine kinase - like protein                         | ST | 0.98 | 2.0 | 2.0 | At1g02220 | NAM (no apical meristem)-like protein                        | TR | 0.96 | 1.8 | 1.4 |
| At1g07550 | <b>Putative Protein</b>                                         | ST | 0.97 | 2.0 | 1.8 | At5g58620 | Putative zinc finger transcription facto                     | TR | 0.96 | 1.8 | 1.4 |
| At2g26190 | Unknown protein                                                 | UN | 0.96 | 2.0 | 2.4 | At2g03840 | Putative senescence-associated protein                       | CF | 0.95 | 1.8 | 1.6 |
| At5g65080 | MADS box transcription factor-like protein                      | TR | 0.97 | 2.0 | 1.5 | At2g28570 | Unknown protein                                              | UN | 0.97 | 1.8 | 2.0 |
| At3g28540 | Hypothetical protein                                            | EM | 0.97 | 2.0 | 5.6 | At5g38850 | disease resistance protein - like                            | DF | 0.96 | 1.8 | 1.4 |
| At2g25810 | Putative aquaporin (tonoplast intrinsic protein)                | TP | 0.96 | 2.0 | 1.5 | At1g23030 | Unknown protein                                              | ST | 0.97 | 1.8 | 2.0 |
| At5g40780 | amino acid permease                                             | TP | 0.96 | 2.0 | 2.9 | At3g17180 | Putative serine carboxypeptidase II                          | PF | 0.98 | 1.8 | 2.4 |
| At4g33940 | Expressed protein; supported by full-length cDNA                | CF | 0.97 | 2.0 | 1.5 | At4g14465 | Expressed protein; supported by full-length cDNA             | UN | 0.98 | 1.8 | 2.4 |
| At1g61890 | Hypothetical protein                                            | TP | 0.98 | 2.0 | 2.3 | At3g05200 | Putative RING-H2 zinc finger protein ATL6                    | TR | 0.97 | 1.8 | 7.0 |
| At4g26090 | disease resistance protein RPS2                                 | DF | 0.96 | 2.0 | 1.4 | At4g30090 | <b>Putative Protein</b>                                      | UN | 0.95 | 1.8 | 1.3 |
| At1g01600 | Similar to cytochrome P450                                      | SM | 0.97 | 2.0 | 2.1 | At3g10720 | Putative pectinesterase                                      | CW | 0.97 | 1.8 | 2.1 |
| At3g53690 | <b>Putative Protein</b>                                         | TR | 0.97 | 2.0 | 1.6 | At1g10550 | Putative endoxyloglucan transferase                          | CW | 0.97 | 1.8 | 2.0 |
| At5g47910 | respiratory burst oxidase protein                               | DF | 0.99 | 2.0 | 3.1 | At3g11280 | MYB-family transcription factor                              | TR | 0.96 | 1.8 | 1.9 |
| At1g70000 | Similar to DNA binding protein MybSt1                           | TR | 0.97 | 2.0 | 2.6 | At5g02230 | Putative protein putative hydrolase                          | PD | 0.97 | 1.8 | 2.5 |
| At3g19970 | Unknown protein                                                 | UN | 0.98 | 2.0 | 2.3 | At4g29440 | Putative suppressor protein                                  | TR | 0.95 | 1.8 | 1.4 |
| At5g46140 | <b>Putative Protein</b>                                         | UN | 0.96 | 2.0 | 1.4 | At4g21760 | beta-glucosidase -like protein                               | PM | 0.97 | 1.8 | 2.4 |
| At1g72450 | Unknown protein                                                 | UN | 0.98 | 2.0 | 1.8 | At3g25640 | Hypothetical protein                                         | UN | 0.98 | 1.8 | 2.9 |
| At3g26980 | Similar to geranylgeranylated protein                           | UN | 0.96 | 1.9 | 1.4 | At3g57070 | <b>Putative Protein</b>                                      | EM | 0.97 | 1.8 | 1.8 |
| At1g35230 | Hypothetical protein                                            | UN | 0.96 | 1.9 | 1.6 | At3g18300 | Hypothetical protein                                         | UN | 0.97 | 1.8 | 1.6 |
| At2g42370 | Hypothetical protein                                            | UN | 0.97 | 1.9 | 1.7 | At5g11070 | <b>Putative Protein</b>                                      | UN | 0.96 | 1.7 | 1.5 |
| At1g56540 | Putative disease resistance protein                             | DF | 0.97 | 1.9 | 2.7 | At5g38280 | receptor serine/threonine kinase PR5K                        | ST | 0.96 | 1.7 | 1.5 |
| At3g50950 | Putative disease resistance protein                             | DF | 0.98 | 1.9 | 2.2 | At5g42010 | <b>Putative Protein</b>                                      | ST | 0.95 | 1.7 | 1.3 |
| At3g24530 | Similar to rubisco expression protein                           | CC | 0.97 | 1.9 | 1.8 | At4g17840 | Hypothetical protein                                         | UN | 0.96 | 1.7 | 1.9 |
| At4g08930 | Putative protein disulfide isomerase                            | PF | 0.97 | 1.9 | 1.6 | At1g28380 | Unknown protein                                              | UN | 0.98 | 1.7 | 3.1 |
| At5g35830 | Unknown protein                                                 | UN | 0.97 | 1.9 | 1.6 | At5g06080 | <b>Putative Protein</b>                                      | UN | 0.96 | 1.7 | 1.5 |
| At3g57240 | beta-13-glucanase                                               | CW | 0.97 | 1.9 | 1.9 | At1g55450 | Similar to embryo-abundant protein                           | PF | 0.96 | 1.7 | 4.2 |
| At4g35590 | <b>Putative Protein</b>                                         | UN | 0.97 | 1.9 | 1.6 | At4g34390 | extra-large G-protein-like                                   | CF | 0.98 | 1.7 | 2.0 |
| At3g53590 | receptor protein kinase -like protein CLV1                      | ST | 0.96 | 1.9 | 1.6 | At2g38790 | Unknown protein                                              | UN | 0.97 | 1.7 | 2.2 |
| At3g26960 | Unknown protein                                                 | UN | 0.99 | 1.9 | 2.5 | At3g11820 | Putative syntaxin                                            | CT | 0.96 | 1.7 | 2.3 |
| At1g07720 | Similar to fatty acid elongase 3-ketoacyl-CoA synthase          | PM | 0.99 | 1.9 | 2.8 | At2g47000 | Putative ABC transporter related to multi drug resistance    | TP | 0.97 | 1.7 | 1.6 |
| At1g74100 | Putative flavonol 4 -sulfotransferase                           | SM | 0.98 | 1.9 | 2.5 | At2g07698 | Hypothetical protein                                         | UN | 0.96 | 1.7 | 1.9 |
| At5g38780 | AtPP - like protein                                             | SM | 0.98 | 1.9 | 2.4 | At4g15430 | Hypothetical protein                                         | UN | 0.96 | 1.7 | 1.8 |
| At1g70850 | Similar to major latex protein (MLP149)                         | DF | 0.97 | 1.9 | 1.8 | At1g53640 | Unknown protein                                              | UN | 0.96 | 1.7 | 1.5 |
| At1g22720 | Putative wall-associated kinase                                 | ST | 0.95 | 1.9 | 1.2 | At3g23090 | Unknown protein                                              | UN | 0.96 | 1.7 | 2.4 |
| At3g27500 | Hypothetical protein                                            | TR | 0.96 | 1.9 | 1.4 | At4g27970 | <b>Putative Protein</b>                                      | UN | 0.96 | 1.7 | 1.4 |
| At4g10390 | Putative protein kinase CLV1 receptor kinase                    | ST | 0.97 | 1.9 | 2.0 | At1g71380 | Putative beta-glucanase                                      | CW | 0.97 | 1.7 | 3.5 |
| At5g05140 | <b>Putative Protein</b>                                         | UN | 0.96 | 1.9 | 1.5 | At1g74810 | Putative anion exchanger                                     | TP | 0.97 | 1.7 | 1.7 |
| At3g15540 | Identical to IAA19                                              | TR | 0.95 | 1.9 | 1.7 | At5g43190 | F-box protein family, AtFBX6                                 | UN | 0.97 | 1.7 | 1.6 |
| At1g03980 | putative phytochelatin synthase                                 | UN | 0.97 | 1.9 | 1.5 | At1g33600 | Putative disease resistance protein                          | DF | 0.97 | 1.7 | 3.9 |
| At2g03730 | Putative uridylyl transferase                                   | UN | 0.96 | 1.9 | 1.5 | At4g39770 | puative protein various predicted proteins                   | PM | 0.97 | 1.7 | 2.2 |
| At5g23130 | Unknown protein                                                 | UN | 0.97 | 1.9 | 1.5 | At5g17860 | potassium-dependent sodium-calcium exchanger - like protein  | TP | 0.96 | 1.7 | 1.5 |
| At1g30790 | Hypothetical protein                                            | UN | 0.97 | 1.9 | 2.7 | At5g56230 | <b>Putative Protein</b>                                      | UN | 0.98 | 1.7 | 2.4 |
| At4g30270 | xyloglucan endo-14-beta-D-glucanase precursor                   | CW | 0.95 | 1.9 | 2.7 | At1g60270 | Similar to beta-glucosidase                                  | PM | 0.97 | 1.7 | 1.8 |
| At4g23190 | serine/threonine kinase - like protein                          | ST | 0.98 | 1.9 | 1.8 | At4g36710 | SCARECROW-like protein                                       | TR | 0.96 | 1.7 | 1.6 |
| At5g17680 | disease resistance protein RPP1-WsB - like protein              | DF | 0.95 | 1.9 | 1.4 | At4g26400 | Putative protein RING zinc finger protein                    | TR | 0.95 | 1.7 | 1.7 |
| At4g20860 | berberine bridge enzyme - like protein                          | SM | 0.96 | 1.9 | 2.4 | At2g30400 | Unknown protein                                              | UN | 0.98 | 1.7 | 2.2 |

|           |                                                           |    |      |     |     |           |                                                                    |    |      |     |      |
|-----------|-----------------------------------------------------------|----|------|-----|-----|-----------|--------------------------------------------------------------------|----|------|-----|------|
| At1g05710 | Unknown protein                                           | UN | 0.98 | 1.7 | 2.3 | At5g50130 | ribitol dehydrogenase-like                                         | SM | 0.97 | 1.6 | 1.9  |
| At1g32170 | Similar to endoxyloglucan transferase                     | CW | 0.98 | 1.7 | 3.9 | At2g19710 | Hypothetical protein                                               | UN | 0.96 | 1.6 | 1.5  |
| At1g64700 | Hypothetical protein                                      | UN | 0.95 | 1.7 | 1.3 | At1g76530 | Unknown protein                                                    | CW | 0.97 | 1.6 | 2.1  |
| At5g16830 | syntaxin homologue                                        | PF | 0.95 | 1.7 | 1.3 | At5g40020 | thaumatin-like protein                                             | DF | 0.95 | 1.6 | 1.9  |
| At1g66880 | Putative protein kinase                                   | ST | 0.96 | 1.7 | 3.6 | At1g42990 | AtbZIP60, bZIP transcription factor                                | TR | 0.96 | 1.6 | 1.7  |
| At1g48120 | Similar to serine/threonine phosphatase PP7               | PM | 0.95 | 1.7 | 1.7 | At5g55950 | Putative Protein                                                   | TP | 0.95 | 1.5 | 1.4  |
| At1g75440 | E2ubiquitin-conjugating enzyme 16 (UBC16)                 | PF | 0.97 | 1.7 | 1.9 | At4g33300 | Putative NBS/LRR disease resistance protein (RFL1)                 | DF | 0.97 | 1.5 | 2.4  |
| At1g62500 | Putative proline-rich cell wall protein                   | CW | 0.96 | 1.7 | 1.5 | At2g44790 | phytocyanin I                                                      | EM | 0.95 | 1.5 | 1.5  |
| At5g41100 | Putative Protein                                          | UN | 0.97 | 1.7 | 2.3 | At5g65470 | Similarity to auxin-independent growth promoter                    | CF | 0.95 | 1.5 | 1.6  |
| At2g17480 | Similar to Mlo proteins from <i>H. vulgare</i>            | DF | 0.96 | 1.7 | 1.6 | At2g29510 | Unknown protein                                                    | UN | 0.95 | 1.5 | 1.4  |
| At4g15810 | Hypothetical protein                                      | UN | 0.96 | 1.7 | 1.5 | At2g23000 | Putative serine carboxypeptidase I                                 | PF | 0.98 | 1.5 | 3.0  |
| At2g45680 | Putative PCF2-like DNA binding protein                    | TR | 0.96 | 1.7 | 2.2 | At5g20820 | Putative Protein                                                   | UN | 0.96 | 1.5 | 1.7  |
| At4g22370 | Hypothetical protein                                      | UN | 0.97 | 1.7 | 2.4 | At1g76040 | Similar to calcium-dependent protein kinase                        | ST | 0.96 | 1.5 | 1.7  |
| At1g54970 | Similar to proline-rich protein                           | UN | 0.97 | 1.7 | 1.8 | At1g08920 | Putative sugar transport proteinERD6                               | TP | 0.95 | 1.5 | 1.5  |
| At1g49840 | Unknown protein                                           | UN | 0.97 | 1.7 | 1.7 | At3g62420 | AtbZIP53, bZIP transcription factor                                | TR | 0.96 | 1.5 | 1.7  |
| At4g30200 | Putative Protein                                          | UN | 0.97 | 1.7 | 1.8 | At3g52370 | Unknown protein                                                    | UN | 0.95 | 1.5 | 1.8  |
| At5g10750 | Putative Protein                                          | UN | 0.97 | 1.7 | 1.9 | At5g47730 | Putative Protein                                                   | PM | 0.96 | 1.5 | 1.7  |
| At4g25010 | MtN3 - like protein MtN3                                  | CF | 0.97 | 1.7 | 1.8 | At2g33460 | Unknown protein                                                    | UN | 0.95 | 1.5 | 1.9  |
| At2g06530 | Unknown protein                                           | PF | 0.95 | 1.7 | 1.7 | At4g15060 | Hypothetical protein                                               | UN | 0.95 | 1.5 | 11.9 |
| At1g14240 | Putative nucleoside triphosphatase                        | PF | 0.95 | 1.7 | 1.6 | At5g50120 | Similarity to GTP-binding regulatory protein and WD-repeat protein | TR | 0.97 | 1.5 | 2.1  |
| At1g23040 | Unknown protein                                           | UN | 0.96 | 1.7 | 1.5 | At5g50335 | Putative IAA6 protein                                              | TR | 0.97 | 1.5 | 2.0  |
| At2g35585 | Expressed protein; supported by full-length cDNA          | UN | 0.95 | 1.7 | 9.2 | At5g67230 | UDP-glucuronyltransferase-like protein                             | PF | 0.95 | 1.5 | 2.0  |
| At4g37800 | endo-xyloglucan transferase - like protein                | CW | 0.96 | 1.7 | 1.7 | At5g02290 | serine/threonine-specific protein kinase NAK                       | ST | 0.96 | 1.5 | 1.8  |
| At5g14700 | cinnamoyl CoA reductase - like protein                    | CW | 0.97 | 1.7 | 1.9 | At4g08300 | Expressed protein; supported by full-length cDNA                   | UN | 0.95 | 1.5 | 1.5  |
| At5g06750 | protein phosphatase 2C-like                               | ST | 0.95 | 1.7 | 1.4 | At5g66460 | mannan endo-14-beta-mannosidase                                    | CW | 0.96 | 1.5 | 1.6  |
| At5g18150 | Putative Protein                                          | UN | 0.95 | 1.7 | 2.2 | At4g23260 | Putative protein receptor protein kinaselpomoea trifida            | ST | 0.96 | 1.5 | 3.1  |
| At2g31090 | Unknown protein                                           | UN | 0.95 | 1.7 | 1.4 | At4g08300 | nodulin-like protein nodulin gene MtN21                            | PD | 0.97 | 1.5 | 2.9  |
| At5g28790 | Putative Protein                                          | UN | 0.97 | 1.7 | 2.1 | At2g37540 | Putative oxidoreductase                                            | SM | 0.96 | 1.5 | 1.8  |
| At5g52870 | Putative Protein                                          | UN | 0.97 | 1.7 | 1.7 | At1g19300 | Unknown protein                                                    | PM | 0.96 | 1.5 | 2.1  |
| At2g39660 | Putative protein kinase                                   | ST | 0.97 | 1.6 | 1.7 | At5g64310 | arabinogalactan-protein                                            | CW | 0.96 | 1.5 | 1.6  |
| At2g04820 | Putative retroelement pol polyprotein                     | TE | 0.97 | 1.6 | 1.8 | At1g72430 | Hypothetical protein                                               | UN | 0.97 | 1.5 | 2.8  |
| At2g27310 | Unknown protein                                           | UN | 0.96 | 1.6 | 1.9 | At5g18930 | S-adenosyl-L-methionine decarboxylase - like protein               | SM | 0.96 | 1.5 | 3.2  |
| At5g14640 | protein kinase MSK-3 - like protein                       | ST | 0.97 | 1.6 | 1.9 | At3g48090 | disease resistance protein EDS1                                    | DF | 0.98 | 1.5 | 3.1  |
| At1g33560 | Similar to disease resistance protein RPP1-WsB            | DF | 0.96 | 1.6 | 1.6 | At3g56360 | Putative Protein                                                   | UN | 0.96 | 1.5 | 1.9  |
| At1g28220 | Putative purine permease                                  | UN | 0.95 | 1.6 | 1.3 | At1g74440 | Similar to YGL010w-like protein                                    | UN | 0.95 | 1.5 | 1.8  |
| At1g33260 | Putative protein kinase                                   | ST | 0.96 | 1.6 | 1.8 | At2g32800 | Putative protein kinase                                            | ST | 0.97 | 1.5 | 3.2  |
| At1g32610 | Hypothetical protein                                      | UN | 0.95 | 1.6 | 1.4 | At2g29340 | Putative tropinone reductase                                       | SM | 0.97 | 1.5 | 2.1  |
| At5g11920 | fructosidase - like protein f                             | PM | 0.96 | 1.6 | 1.4 | At3g07340 | unknown protein contains helix-loop-helix DNA binding motif        | PM | 0.97 | 1.5 | 3.2  |
| At4g04610 | 5-adenylsulfate reductase                                 | PM | 0.96 | 1.6 | 2.4 | At5g52060 | Putative Protein                                                   | UN | 0.96 | 1.5 | 1.8  |
| At1g13260 | DNA-binding protein RAV1                                  | TR | 0.97 | 1.6 | 2.0 | At3g07700 | Unknown protein                                                    | ST | 0.96 | 1.5 | 2.1  |
| At5g65070 | MADS box transcription factor-like                        | TR | 0.97 | 1.6 | 2.6 | At1g70090 | Putative glycosyl transferase                                      | UN | 0.96 | 1.5 | 1.9  |
| At5g62620 | Putative Protein                                          | DF | 0.96 | 1.6 | 1.6 | At2g34390 | Putative aquaporin (plasma membrane intrinsic protein)             | TP | 0.96 | 1.5 | 2.4  |
| At5g11610 | Putative Protein                                          | SM | 0.95 | 1.6 | 1.6 | At2g15670 | Unknown protein                                                    | UN | 0.95 | 1.5 | 1.9  |
| At4g08290 | nodulin-like protein nodulin gene MtN21                   | PD | 0.95 | 1.6 | 1.6 | At5g43610 | sucrose transporter protein                                        | TP | 0.97 | 1.5 | 3.3  |
| At5g03760 | Putative protein beta-(1-3)-glucosyl transferase          | CW | 0.96 | 1.6 | 1.5 | At4g22980 | Putative Protein                                                   | UN | 0.96 | 1.5 | 3.0  |
| At2g39360 | Putative protein kinase                                   | ST | 0.97 | 1.6 | 3.0 | At3g50770 | calmodulin-like protein flagellar calmodulin                       | ST | 0.96 | 1.5 | 1.6  |
| At4g11000 | Putative Protein                                          | UN | 0.98 | 1.6 | 3.1 | At2g19050 | Putative GDSL-motif lipase/hydrolase                               | PM | 0.97 | 1.4 | 2.3  |
| At5g22990 | Z-C2H2C2H2-type zinc finger protein-like                  | TR | 0.98 | 1.6 | 2.4 | At1g32870 | Putative NAM protein                                               | TR | 0.96 | 1.4 | 1.7  |
| At4g22710 | cytochrome P450 - like protein flavonoid 3 5 -hydroxylase | SM | 0.97 | 1.6 | 2.6 | At4g16515 | Expressed protein; supported by full-length cDNA                   | UN | 0.96 | 1.4 | 1.8  |
| At5g04860 | Unknown protein                                           | UN | 0.96 | 1.6 | 1.5 | At1g63820 | Hypothetical protein                                               | TR | 0.97 | 1.4 | 3.1  |
| At3g15530 | Unknown protein                                           | UN | 0.96 | 1.6 | 1.6 | At1g71330 | Putative ABC transporter                                           | TP | 0.96 | 1.4 | 1.9  |
| At2g38060 | Putative Na+-dependent inorganic phosphate cotransporter  | PM | 0.96 | 1.6 | 1.8 | At3g05580 | Putative serine threonine protein phosphatase type I               | ST | 0.96 | 1.4 | 2.1  |
| At3g08490 | Hypothetical protein                                      | UN | 0.96 | 1.6 | 1.9 | At4g20370 | TWIN SISTER OF FT (TSF) terminal flower1                           | PD | 0.97 | 1.4 | 2.1  |
| At3g26970 | Similar to geranylgeranylated protein                     | UN | 0.95 | 1.6 | 1.6 | At4g27350 | Putative Protein                                                   | UN | 0.96 | 1.4 | 1.9  |
| At1g67360 | Putative stress related protein                           | UN | 0.97 | 1.6 | 1.7 | At1g21370 | Hypothetical protein                                               | UN | 0.95 | 1.4 | 1.5  |
| At1g73080 | Smilar to receptor protein kinase                         | ST | 0.96 | 1.6 | 1.7 | At2g43320 | Hypothetical protein                                               | UN | 0.96 | 1.4 | 1.7  |
| At1g47485 | Expressed protein; supported by full-length cDNA          | UN | 0.96 | 1.6 | 1.6 | At2g28350 | ARF10unknown protein                                               | TR | 0.95 | 1.4 | 1.5  |
| At5g46115 | Expressed protein; supported by full-length cDNA          | UN | 0.96 | 1.6 | 1.6 | At5g52640 | heat-shock protein                                                 | UN | 0.96 | 1.4 | 2.2  |
| At4g19230 | cytochrome P450                                           | SM | 0.97 | 1.6 | 1.8 | At1g61260 | Similar to cotton fiber expressed protein 1                        | UN | 0.96 | 1.4 | 1.9  |
| At2g17260 | Putative ligand-gated ion channel protein                 | TP | 0.96 | 1.6 | 1.6 | At5g53970 | tyrosine aminotransferase                                          | PM | 0.95 | 1.4 | 1.6  |
| At5g07240 | Putative protein SF16 protein pollen specific             | UN | 0.97 | 1.6 | 1.8 | At5g21120 | ethylene-insensitive3-like2 (EIL2)                                 | ST | 0.96 | 1.4 | 1.8  |
| At4g37150 | hydroxynitrile lyase like protein                         | DF | 0.95 | 1.6 | 1.5 | At5g50570 | Similarity to squamosa promoter binding protein                    | TR | 0.95 | 1.4 | 1.7  |
| At1g15430 | Hypothetical protein                                      | UN | 0.95 | 1.6 | 1.4 | At1g52880 | NAM-like protein                                                   | TR | 0.97 | 1.4 | 2.2  |
| At1g53560 | Hypothetical protein                                      | UN | 0.96 | 1.6 | 1.6 | At5g53830 | Putative Protein                                                   | UN | 0.96 | 1.4 | 2.1  |
| At5g54730 | Putative Protein                                          | UN | 0.96 | 1.6 | 1.5 | At5g26340 | hexose transporter - like protein                                  | TP | 0.95 | 1.4 | 1.6  |
| At1g70250 | Putative receptor serine/threonine kinase PR5             | ST | 0.96 | 1.6 | 1.8 | At2g42150 | Hypothetical protein                                               | PM | 0.96 | 1.4 | 1.7  |
| At4g32800 | transcription factor TINY homolog                         | TR | 0.95 | 1.6 | 3.5 | At1g17620 | Unknown protein                                                    | DF | 0.97 | 1.4 | 2.3  |
| At4g36030 | Putative Protein                                          | UN | 0.96 | 1.6 | 1.9 | At3g28270 | Similar to At14a protein                                           | UN | 0.97 | 1.4 | 6.1  |
| At2g26580 | Hypothetical protein                                      | UN | 0.96 | 1.6 | 1.7 | At5g38340 | disease resistance - like protein                                  | DF | 0.96 | 1.4 | 2.0  |
| At2g30680 | Hypothetical protein                                      | UN | 0.97 | 1.6 | 2.2 | At5g53370 | pectinesterase                                                     | CW | 0.97 | 1.4 | 2.6  |
| At3g62040 | Hypothetical protein                                      | PD | 0.96 | 1.6 | 1.7 | At1g68410 | Putative protein phosphatase-2C                                    | ST | 0.96 | 1.4 | 1.7  |
| At5g11260 | AtbZIP56, identical to HY5 protein                        | TR | 0.96 | 1.6 | 1.6 | At1g73330 | Dr4(protease inhibitor) identical to Dr4                           | UN | 0.97 | 1.4 | 3.3  |
| At4g22820 | predicted protein PVPR3                                   | TR | 0.96 | 1.6 | 1.5 | At3g53810 | serine/threonine-specific kinase like protein                      | ST | 0.96 | 1.4 | 2.0  |
| At2g07687 | Hypothetical protein                                      | UN | 0.97 | 1.6 | 1.9 | At5g05960 | Putative Protein                                                   | UN | 0.96 | 1.4 | 2.3  |
| At4g15530 | pyruvateorthophosphate dikinase                           | EM | 0.98 | 1.6 | 3.8 | At1g68630 | Hypothetical protein                                               | UN | 0.95 | 1.4 | 2.2  |
| At1g30020 | Unknown protein                                           | UN | 0.97 | 1.6 | 2.1 | At5g52710 | Unknown protein                                                    | UN | 0.97 | 1.4 | 2.6  |
| At4g35060 | Putative Protein                                          | PF | 0.97 | 1.6 | 2.0 | At1g14190 | Putative mandelonitrile lyase                                      | UN | 0.95 | 1.4 | 1.8  |
| At4g24260 | endo-14-beta-glucanase like protein                       | CW | 0.95 | 1.6 | 1.6 | At1g78500 | Similar to beta-Amyrin Synthase                                    | SM | 0.97 | 1.4 | 2.6  |
| At3g18690 | Hypothetical protein                                      | UN | 0.96 | 1.6 | 1.7 | At5g24150 | squalene monooxygenase                                             | SM | 0.96 | 1.4 | 2.0  |
| At2g21320 | Putative CONSTANS-like B-box zinc finger protein          | TR | 0.96 | 1.6 | 1.6 | At2g24550 | Unknown protein                                                    | UN | 0.96 | 1.4 | 2.2  |



|           |                                                          |    |      |     |     |           |                                                                   |    |      |     |     |
|-----------|----------------------------------------------------------|----|------|-----|-----|-----------|-------------------------------------------------------------------|----|------|-----|-----|
| At3g48460 | lipase – like protein                                    | PM | 0.97 | 1.4 | 2.3 | At5g20440 | Putative mitosis and maintenance of ploidy protein                | CC | 0.96 | 1.3 | 2.5 |
| At3g02830 | zinc finger protein 1 (zfn1)                             | TR | 0.95 | 1.4 | 1.7 | At1g55180 | Similar to phospholipase D alpha                                  | PM | 0.96 | 1.3 | 2.4 |
| At5g48560 | Putative Protein                                         | TR | 0.96 | 1.4 | 3.4 | At1g44100 | amino acid permease                                               | TP | 0.96 | 1.3 | 2.7 |
| At4g30210 | NADPH–ferrihemoprotein reductase (ATR2)                  | SM | 0.97 | 1.4 | 2.3 | At3g44630 | disease resistance protein homolog                                | DF | 0.95 | 1.3 | 2.6 |
| At5g51440 | mitochondrial heat shock 22 kd protein–like              | UN | 0.96 | 1.4 | 1.8 | At5g61900 | copine – like protein                                             | CT | 0.96 | 1.3 | 2.3 |
| At4g31550 | AtWRKY11, putative DNA–binding protein                   | TR | 0.96 | 1.4 | 1.8 | At5g25120 | cytochrome P450–like protein                                      | SM | 0.96 | 1.3 | 2.3 |
| At4g37760 | squalene epoxidase – like protein s                      | SM | 0.96 | 1.4 | 2.1 | At1g07610 | metallothionein–like protein                                      | DF | 0.95 | 1.3 | 2.1 |
| At3g02550 | Unknown protein                                          | UN | 0.96 | 1.4 | 2.0 | At1g22280 | Similar to protein phosphatase type 2C                            | ST | 0.95 | 1.3 | 1.9 |
| At5g24120 | sigma–like factor (emb CAA77213.1)                       | TR | 0.96 | 1.4 | 2.5 | At2g07741 | predicted protein                                                 | UN | 0.95 | 1.3 | 1.9 |
| At2g36790 | Putative glucosyl transferase                            | CW | 0.96 | 1.4 | 2.7 | At2g20560 | Putative heat shock protein                                       | DF | 0.96 | 1.3 | 2.6 |
| At1g30840 | Hypothetical protein                                     | UN | 0.96 | 1.4 | 2.1 | At3g28680 | Hypothetical protein                                              | UN | 0.95 | 1.3 | 2.2 |
| At3g23030 | auxin–inducible gene (IAA2)                              | TR | 0.97 | 1.4 | 2.3 | At5g44920 | Similarity to disease resistance protein                          | DF | 0.95 | 1.3 | 2.0 |
| At4g05620 | Putative Protein                                         | UN | 0.95 | 1.4 | 1.6 | At1g72460 | Putative receptor–like protein kinase                             | ST | 0.95 | 1.3 | 1.8 |
| At2g46440 | Putative cyclic nucleotide–regulated ion channel protein | TP | 0.96 | 1.4 | 2.2 | At4g16860 | disease resistance RPP5 like protein                              | DF | 0.96 | 1.3 | 2.5 |
| At5g25640 | Putative Protein                                         | UN | 0.97 | 1.4 | 2.3 | At1g35260 | Similar to ripening–induced protein                               | DF | 0.96 | 1.3 | 2.0 |
| At1g20180 | Hypothetical protein                                     | UN | 0.95 | 1.4 | 4.1 | At1g24530 | Hypothetical protein                                              | PM | 0.96 | 1.3 | 2.4 |
| At2g23690 | Unknown protein                                          | UN | 0.96 | 1.4 | 2.0 | At4g17090 | Putative beta–amylase                                             | PM | 0.96 | 1.3 | 2.5 |
| At1g65060 | 4–coumarate:CoA ligase 3                                 | SM | 0.96 | 1.4 | 1.8 | At1g55910 | Expressed protein; supported by full–length cDNA                  | TP | 0.95 | 1.3 | 1.9 |
| At4g29230 | Putative Protein                                         | PD | 0.97 | 1.4 | 2.4 | At4g32770 | Putative Protein                                                  | UN | 0.95 | 1.3 | 1.9 |
| At5g61010 | Putative protein leucine zipper–containing protein       | TR | 0.95 | 1.4 | 3.0 | At5g42140 | TMV resistance protein–like                                       | DF | 0.95 | 1.3 | 1.8 |
| At1g48320 | Hypothetical protein                                     | UN | 0.97 | 1.4 | 2.9 | At2g19310 | Putative small heat shock protein                                 | DF | 0.95 | 1.3 | 2.6 |
| At5g58500 | Putative Protein                                         | UN | 0.96 | 1.4 | 1.9 | At2g21185 | Expressed protein; supported by full–length cDNA                  | UN | 0.95 | 1.3 | 2.0 |
| At5g09760 | pectin methylesterase – like protein                     | CW | 0.96 | 1.4 | 2.0 | At4g36110 | Putative auxin–induced protein                                    | TR | 0.95 | 1.3 | 1.8 |
| At5g44670 | Putative Protein                                         | UN | 0.96 | 1.4 | 2.0 | At5g53030 | Putative Protein                                                  | TR | 0.95 | 1.2 | 2.0 |
| At1g14390 | Putative receptor–like protein kinase                    | ST | 0.96 | 1.3 | 2.9 | At1g22710 | Putative sucrose transport protein, SUC2                          | TP | 0.96 | 1.2 | 2.4 |
| At2g02450 | NAM (no apical meristem)–like protein                    | TR | 0.97 | 1.3 | 3.6 | At4g19530 | TMV resistance protein N – like                                   | DF | 0.96 | 1.2 | 2.9 |
| At5g64170 | Putative Protein                                         | UN | 0.95 | 1.3 | 1.7 | At2g46530 | ARF11, putative ARF1 family auxin responsive transcription factor | TR | 0.95 | 1.2 | 1.9 |
| At1g63550 | Unknown protein                                          | ST | 0.97 | 1.3 | 2.8 | At1g65860 | Putative flavin–containing monooxygenase FMO3                     | PM | 0.96 | 1.2 | 2.6 |
| At3g10420 | Unknown protein                                          | UN | 0.95 | 1.3 | 1.7 | At4g13420 | potassium transporter – like protein                              | TP | 0.95 | 1.2 | 2.0 |
| At3g07450 | Putative 5B–anther specific protein                      | UN | 0.96 | 1.3 | 2.5 | At3g09960 | Unknown protein                                                   | ST | 0.95 | 1.2 | 2.2 |
| At5g44070 | phytochelatin synthase                                   | DF | 0.96 | 1.3 | 2.2 | At4g13510 | ammonium transport protein (AMT1)                                 | TP | 0.96 | 1.2 | 2.9 |
| At5g35060 | Putative Protein                                         | UN | 0.95 | 1.3 | 2.0 | At2g29330 | Putative tropinone reductase                                      | SM | 0.95 | 1.2 | 4.9 |
| At5g42760 | Putative Protein                                         | UN | 0.96 | 1.3 | 2.6 | At1g65450 | Hypothetical protein                                              | SM | 0.95 | 1.2 | 2.5 |
| At5g38990 | protein kinase – like protein                            | ST | 0.96 | 1.3 | 2.0 | At1g27940 | Putative P–glycoprotein                                           | TP | 0.96 | 1.2 | 2.9 |

a, Arabidopsis Gene Index (AGI) number.

b, Functional classification using MIPS ([http://mips.gsf.de/proj/thal/db/tables/tables\\_func\\_frame.html](http://mips.gsf.de/proj/thal/db/tables/tables_func_frame.html)); TR, Transcriptional Regulation; ST, Signal Transduction; CW, Cell Wall; TP, Transport Facilitation; DF, Defense; PM, Primary Metabolism; SM, Secondary Metabolism; PS, Protein Synthesis; EM, Energy Metabolism; PF, Protein Fate; CF, Cell Fate, CT, Cellular Transport, CC, Cell Cycle; TE, Transposable Element; UN, unclassified.

c, Correlation coefficient (similarity of expression pattern) calculated by GeneSpring 4.2.1 program (Silicon Genetics, Redwood City, CA).

d, Fold change of gene expression signals over control; (weight treatment / control)

e, Fold change of gene expression signals over immature; (intermediate stage / immature stage)
